# Supplementary material for: Visualization of conformational changes and membrane remodeling leading to genome delivery by viral class-II fusion machinery
Source: Research Square preprint supplement (doi:10.21203/rs.3.rs-1414199/v1), 2022-03-10
Supplement: Supplementary file 2 [file f8f906e2c07e44e9cb0da46d.xlsx]

## Sheet: Sheet1
Supplemental Table 1: Number of CHIKV-liposome contacts identified for each stage in the membrane fusion process for different pH and timepoints.
		E1-attachment		E1 HT/Membrane Insertion			Hemifusion		Post-fusion NC-release
pH	Time (minutes)	Recruitment	Attachment	E1-HT	E1-HT insertion	Membrane superposition	Hemifusion	Fusion pore	Post-fusion	Total
5.1	0.5	0	16	8	2	6	0	1	1	34
	1	5	17	5	8	2	2	5	19	63
	3	0	48	12	11	12	9	10	64	166
5.6	0.5	100	50	2	0		1	0	0	153
	2	3	43	10	17	2	0	2	2	79
	4	0	6	3	5	4	1	3	27	49

## Sheet: Sheet2
pH and time	Recruitment	Attachment	E1-HT	E1-HT insertion	Membrane superposition	Hemifusion	Fusion pore	Post-fusion
pH 5.1- 30s (total:34)
		0.47			0.47		0.03	0.03
pH 5.1- 1minute (total:63)
		0.35			0.24		0.11	0.3
pH 5.1 - 3minutes (total:166)
		0.29			0.211		0.114	0.39
pH 5.6 - 30s (total:153)
		0.98			0.013		0.0065	0
pH 5.6- 2 min (total: 79)
		0.58			0.37		0.025	0.025
pH 5.6 -5min (total: 49)
		0.122			0.245		0.082	0.55
pH5.9
ph 5.9 (beyond 2min -confirm)63
		0.68			0.27		0.016	0.032
pH 5.1 30s	0	0	0	0	0
	0.5	0.47	0.47	0.03	0.03
	1	0.35	0.24	0.11	0.3
1m	1.5
3m	2
	2.5
	3	0.29	0.211	0.114	0.39
pH 5.6 30s	0	0	0	0	0
2min	0.5	0.98	0.013	0.0065	0
	1
5min	1.5
	2	0.58	0.37	0.025	0.025
	2.5
	3
	3.5
	4
	4.5
	5	0.122	0.245	0.082	0.55
